# Supplementary material for: A multi-stimuli-responsive CsPbBr3@PL-MOF functional anti-counterfeiting material
Source: Royal Society of Chemistry journal article supplement (doi:10.1039/d2nj05102h), 2022-11-29
Supplement: d2nj05102h1.pdf [file d2nj05102h1.pdf]

# A multi-stimuli-responsive CsPbBr<sub>3</sub>@PL-MOFs functional anti-counterfeiting material

*Yanli Li, Huijun Li\*, Zhouqing Xu\**

Department of Chemistry and Chemical Engineering, Henan Polytechnic University, Jiaozuo

454000, P. R. China

## Supporting Figures.

**Fig. S1** (a) The XRD patterns of **simulated HPU-22** and **synthesized HPU-22**; (b) the SEM image and (c) elemental mapping of **HPU-22**.

**Fig. S2** XPS survey spectra of **CsPbBr<sub>3</sub>@BT@HPU-22**.

**Fig. S3** The PXRD patterns of **CsPbBr<sub>3</sub>@HPU-22** after moisture treating for different times.

**Fig. S4** The XPS results of **HPU-22**, **CsPbBr<sub>3</sub>@HPU-22** and **H<sub>2</sub>O@CsPbBr<sub>3</sub>@HPU-22** after drying.

**Fig. S5** The PL properties data of **HPU-22** treated by HCl and Et<sub>3</sub>N.

**Fig. S6** The PXRD patterns of **HPU-22**, **HPU-22** treated by HCl and **HPU-22** treated by HCl and Et<sub>3</sub>N.

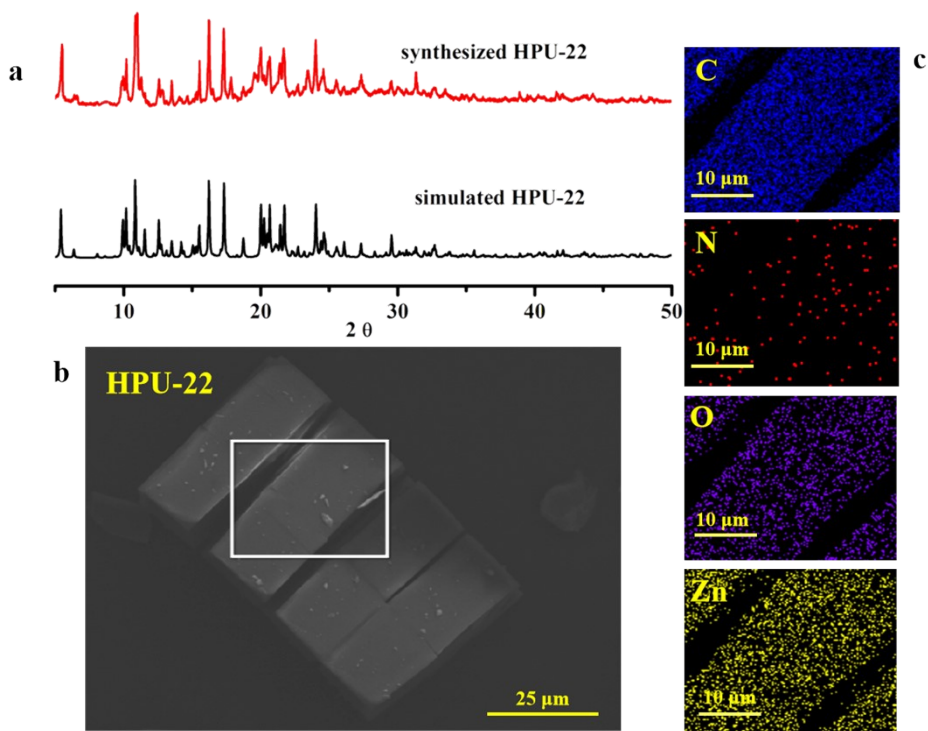

**Fig. S1** (a) The XRD patterns of **simulated HPU-22** and **synthesized HPU-22**; (b) the SEM image and (c) elemental mapping of **HPU-22**.

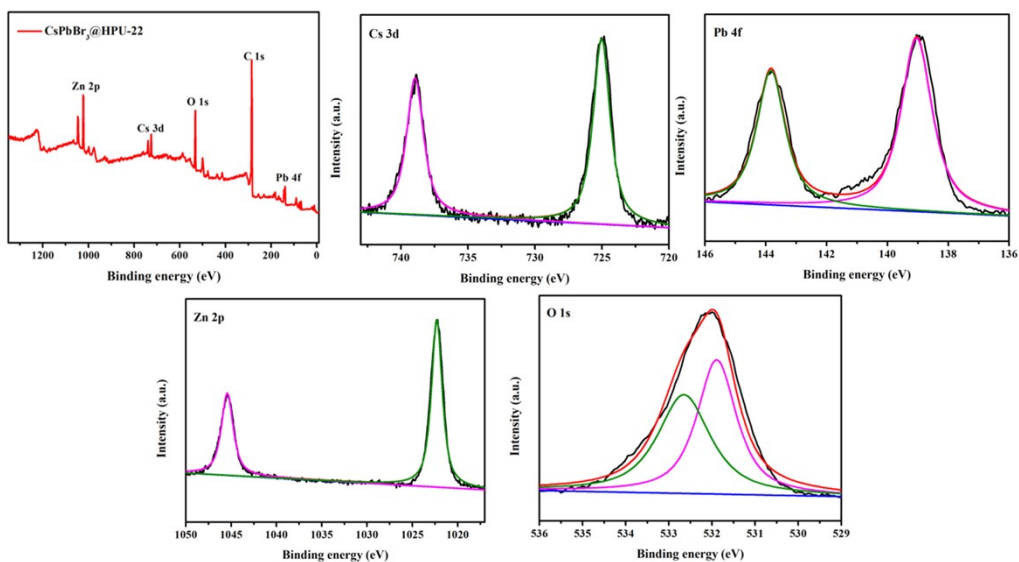

**Fig. S2** XPS survey spectra of **CsPbBr<sub>3</sub>@BT@HPU-22**.

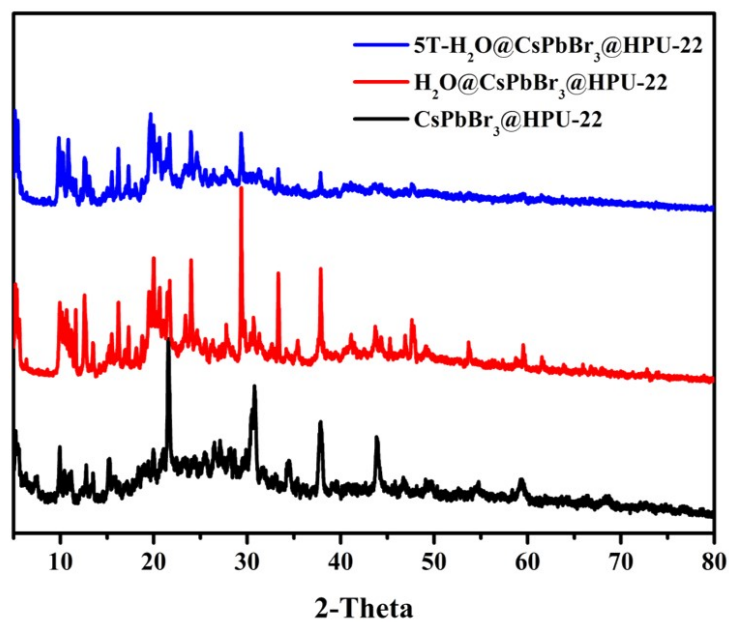

Fig. S3 The PXRD patterns of CsPbBr<sub>3</sub>@HPU-22 after moisture treating for different times.

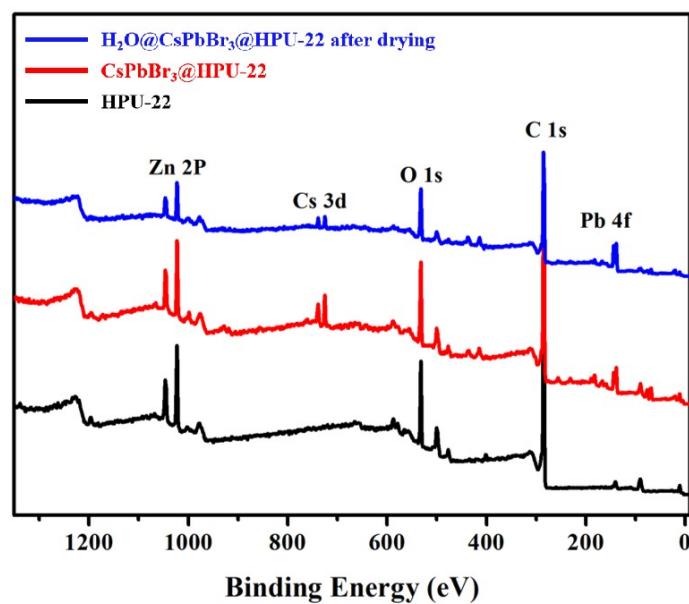

Fig. S4 The XPS results of HPU-22, CsPbBr<sub>3</sub>@HPU-22 and H<sub>2</sub>O@CsPbBr<sub>3</sub>@HPU-22 after drying.

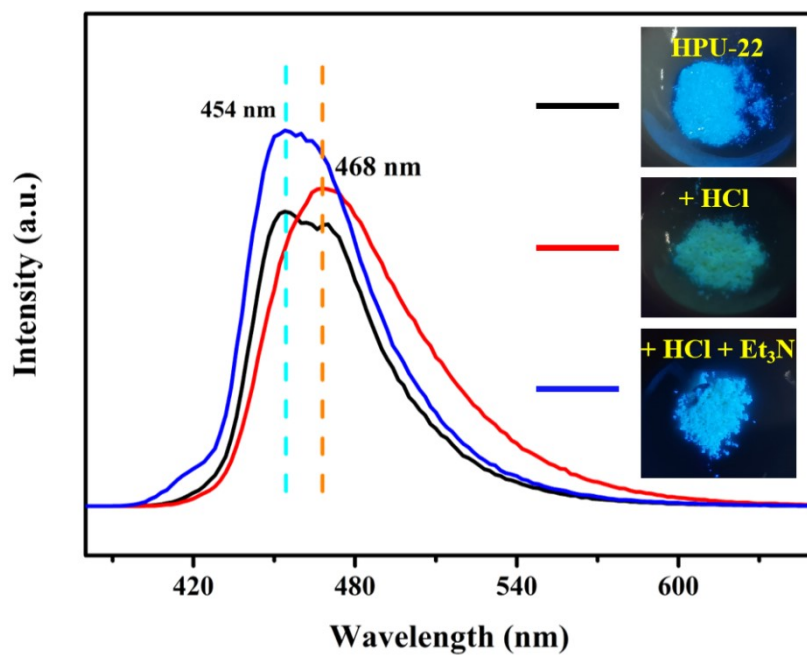

Fig. S5 The PL properties data of HPU-22 treated by HCl and Et<sub>3</sub>N.

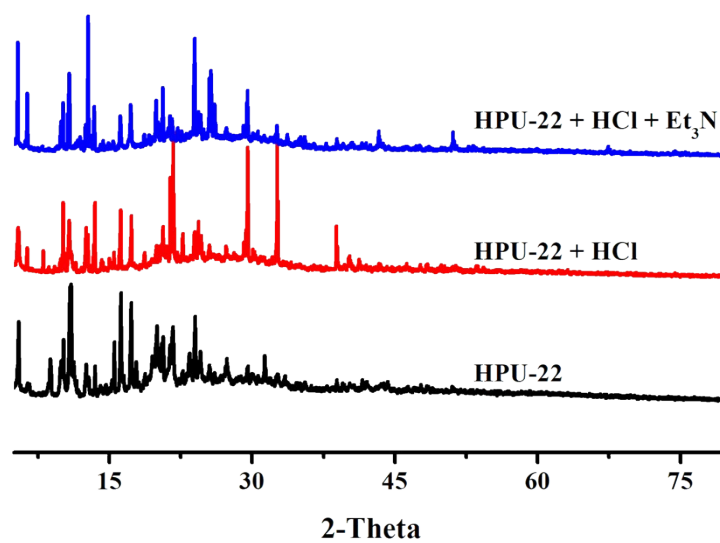

Fig. S6 The PXRD patterns of HPU-22, HPU-22 treated by HCl and HPU-22 treated by HCl and Et<sub>3</sub>N.
